1 **Improvement in Patient-Reported Sleep in Type 2 Diabetes and Prediabetes Participants**  
2 **Receiving a Continuous Care Intervention with Nutritional Ketosis**

3

4 *Morgan J. Siegmann<sup>1,2,3</sup>, Shaminie J Athinarayanan<sup>4</sup>, Sarah J Hallberg<sup>4,5</sup>, Amy L. McKenzie<sup>4</sup>,*  
5 *Nasir H. Bhanpur<sup>4</sup>, Wayne W. Campbell<sup>6</sup>, James P. McCarter<sup>4,7</sup>, Stephen D. Phinney<sup>4</sup>, Jeff S.*  
6 *Volek<sup>4,8</sup>, Christa J. Van Dort<sup>1,2,3</sup>*

7

8 <sup>1</sup> Department of Anesthesia, Critical Care and Pain Medicine, Massachusetts General Hospital,  
9 Boston, MA, USA

10 <sup>2</sup> Division of Sleep Medicine, Harvard Medical School, Boston, MA, USA

11 <sup>3</sup> Department of Brain and Cognitive Sciences, Massachusetts Institute of Technology,  
12 Cambridge, MA, USA

13 <sup>4</sup> Virta Health, 535 Mission Street, San Francisco, CA, USA

14 <sup>5</sup> Indiana University Health Arnett, Lafayette, IN, USA

15 <sup>6</sup> Department of Nutrition Science, Purdue University, West Lafayette, IN, USA

16 <sup>7</sup> Department of Genetics, Washington University School of Medicine, St Louis, MO, USA

17 <sup>8</sup> Department of Human Sciences, The Ohio State University, Columbus, OH, USA

18

19 **Word Count:** 4000

20 **Tables:** 2

21 **Figures:** 4

22 **Correspondence:**

23 Christa J Van Dort, PhD

24 Department of Anesthesia, Critical Care and Pain Medicine, Massachusetts General Hospital

25 Division of Sleep Medicine, Harvard Medical School

26 Mailing address: MGH Building 149 Room 4140, 149 13th Street, Charlestown, MA 02129

27 Email: [cvandort@mgh.harvard.edu](mailto:cvandort@mgh.harvard.edu)

28 Telephone number: (617) 643-9857

29

30 **Conflicts of Interest:** SJA, SJH, ALM, NHB, JPM, and SDP are employed by Virta Health Corp

31 and were offered company's stock options. SDP and JSV are founders of Virta Health Corp.

32 CJV, MJS and WWC have no conflict of interest to declare.

33

34 **Financial support:** Virta Health

35

36 **Author contributions:** S.J.A, M.S, C.J.V and J.P.M drafted the manuscript. A.L.M, N.H.B,

37 S.J.H and S.J.A participated in data acquisition and compiling. M.S and S.J.A analyzed the

38 data. C.J.V supervised this particular analysis, J.P.M, A.L.M, S.J.H, N.H.B, W.W.C, S.D.P and

39 J.S.D edited the manuscript. W.W.C. proposed measuring subjective sleep quality as part of the

40 parent Continuous Care Intervention clinical trial. All authors approved the final version of the

41 manuscript.

42

43 **Abbreviations:**

44 CCI, continuous care intervention; UC, usual care; T2D, type 2 diabetes; BMI, body mass index;

45 PSQI, Pittsburgh Sleep Quality Index; OSA, obstructive sleep apnea; HbA1c, hemoglobin A1c;

46 CPAP, continuous positive airway pressure; AHI, apnea and hypopnea indices; KD, ketogenic

47 diet; REM, rapid eye movement; SWS, slow wave sleep; BHB, beta-hydroxybutyrate; HOMA-

48 IR, homeostatic model assessment of insulin resistance; hsCRP, high-sensitivity C-reactive

49 protein

50

51

52

53

54 **Abstract**

55 **Objective:** Sleep disruption is frequently associated with type 2 diabetes (T2D) and  
56 hyperglycemia. We recently reported the effectiveness of a continuous care intervention (CCI)  
57 emphasizing nutritional ketosis for improving HbA1c, body weight and cardiovascular risk  
58 factors in T2D patients. The present study assessed the effect of this CCI approach on sleep  
59 quality using a subjective patient-reported sleep questionnaire.

60 **Methods:** A non-randomized, controlled longitudinal study; 262 T2D and 116 prediabetes  
61 patients enrolled in the CCI and 87 separately recruited T2D patients continued usual care (UC)  
62 treatment. Patients completed the Pittsburgh Sleep Quality Index (PSQI) questionnaire. A PSQI  
63 score of >5 (scale 0 to 21) was used to identify poor sleepers.

64 **Results:** Global sleep quality improved in the CCI T2D ( $p<0.001$ ) and prediabetes ( $p<0.001$ )  
65 patients after one year of intervention. Subjective sleep quality (component 1), sleep  
66 disturbance (component 5) and daytime dysfunction (component 7), also showed improvements  
67 in the CCI T2D ( $p<0.01$  for sleep quality and sleep disturbance; and  $p<0.001$  for daytime  
68 dysfunction) and prediabetes patients ( $p<0.001$  for all three components); compared to the UC  
69 T2D group after one year. The proportion of patients with poor sleep quality was significantly  
70 reduced after one year of CCI (T2D; from 68.3% at baseline to 56.5% at one year,  $p=0.001$  and  
71 prediabetes; from 77.9% at baseline to 48.7% at one year,  $p<0.001$ ).

72 **Conclusion:** This study demonstrates improved sleep quality as assessed by PSQI in patients  
73 with T2D and prediabetes undergoing CCI including nutritional ketosis but not in T2D patients  
74 receiving UC. The dietary intervention benefited both sleep quality and the severity of T2D  
75 symptoms suggesting that nutritional ketosis improves overall health via multiple mechanisms.

76 **Keywords:** Type 2 diabetes, prediabetes, ketogenic diet, PSQI, nutritional ketosis

77

78

79

80

81 **Introduction**

82

83

84

85

86

87

88

89

90

91

92

93

94

95

96

97

98

99

100

101

102

103

104

105

Sleep disturbance is associated with obesity and type 2 diabetes (T2D), yet the

bidirectional relationship between sleep and glucose metabolism is not fully understood. Sleep

disruption is linked to increased diabetes prevalence in both experimental<sup>1-4</sup> and

epidemiological studies<sup>5-7</sup>. In addition, the severity of hyperglycemia in individuals with diabetes

is associated with poor sleep quality<sup>8,9, 10, 11</sup>, short sleep duration<sup>8,9, 12,13</sup> and a greater tendency

to develop sleep disorders including obstructive sleep apnea (OSA)<sup>14,15</sup>. Both the International

Diabetes Federation (IDF) and American Diabetes Association (ADA) recommend evaluating

T2D patients for disrupted sleep and strongly encourage treatment when found<sup>16,17</sup>.

Weight loss is one of the most effective ways of treating sleep disruption and OSA in

obese patients. Lifestyle intervention induced weight loss showed significant reduction in the

apnea and hypopnea indices (AHI) in conjunction with a decrease in hemoglobin A1c (HbA1c)

levels in a randomized controlled trial of obese OSA patients with comorbid diabetes<sup>18</sup>. Further,

weight loss following bariatric surgery is effective at improving glycemic control and improving

AHI in OSA patients<sup>19</sup>. Intervention studies specifically targeting sleep disruption in OSA

patients without any effect on weight, such as continuous positive airway pressure (CPAP)

treatment, have shown contradictory results for glycemic control. Most CPAP intervention

studies in T2D reported no glycemic benefit from the treatment<sup>20,21</sup>, but one study demonstrated

a slight reduction in HbA1c<sup>22</sup>. In contrast, CPAP studies on prediabetic OSA patients showed

improvements in insulin sensitivity and glucose tolerance<sup>23,24</sup>. It is not clear from these studies

whether improvement of glycemic control in conjunction with weight loss improves sleep quality

or vice-versa.

A few studies have investigated the impact of dietary macronutrient composition on

sleep duration and quality. Two studies reported reduction of slow wave sleep (SWS) and

106 elevation of rapid eye movement (REM) sleep in individuals consuming higher carbohydrates  
107 (600g carbohydrate or 80% energy from carbohydrate) <sup>25,26</sup>. Another study reported the effect of  
108 a high carbohydrate (56% energy from carbohydrate) diet in reducing sleep onset latency when  
109 compared to a control diet <sup>27</sup>. Studies investigating low carbohydrate diets showed the opposite  
110 effect; reduced REM <sup>28</sup>, increased REM onset latency <sup>29</sup> and increased SWS <sup>28</sup>, even after 4  
111 hours of administering a very low carbohydrate meal <sup>28</sup>. Collectively, these findings signify  
112 dietary carbohydrate content as an important factor in modulating sleep architecture, but  
113 extrapolation from these studies is limited since they were conducted in experimentally  
114 controlled conditions with small numbers of healthy individuals in a short time-span and with  
115 diets administered at specific time points.

116 Population and intervention-based studies on the overall impact of carbohydrate intake  
117 on sleep indices or sleep quality are very limited. Katagiri et al. showed reduced sleep quality in  
118 individuals consuming more carbohydrates as measured by a subjective sleep measure, the  
119 Pittsburgh Sleep Quality Index (PSQI) <sup>30</sup>. Studies investigating the effect of ketogenic diet (KD)  
120 in children with sleep problems showed improvement in daytime sleepiness <sup>31,32</sup> as well as  
121 positive changes in sleep architecture <sup>32,33</sup>. However, in one of these studies, sleep  
122 improvements were suggested to be due to weight loss rather than the KD <sup>33</sup>. Despite restricted  
123 carbohydrate intake concurrent with sleep improvement in these children, SWS decreased <sup>33</sup>  
124 and REM increased <sup>32,33</sup> which contradicts studies on carbohydrate intake and sleep  
125 architecture in adults <sup>25,26,28</sup>. Carbohydrate restriction and ketogenic diets are widely used in the  
126 clinical management of obesity and diabetes, but studies assessing the effect of this diet on  
127 sleep are currently limited. We recently demonstrated a continuous remote care treatment for  
128 T2D including nutritional ketosis significantly improved glycemic control, weight, and  
129 cardiovascular disease risk factors and reduced diabetes medication use at one year <sup>34-36</sup>.  
130 The purpose of this study was to assess the effect of the intervention by time-interval on the  
131 global PSQI and its seven component scores as well as compared its changes with different

132 intervention and disease categories. We also assessed the relationship between changes in the  
133 sleep parameters versus key biochemical parameters, and also investigated the correlation of  
134 pain, circadian rhythm disruption and CPAP usage versus patient-perceived sleep status. We  
135 hypothesized that the global sleep indexes would improve analogously, as improvement in other  
136 key biochemical parameters observed in the intervention.

## 137 **Materials and Methods**

### 138 ***Study participants and design***

139 This study is part of a clinical trial (*Clinical trials.gov identifier: NCT02519309*) that was  
140 approved by the Franciscan Health Lafayette Institutional Review Board. Patients between age  
141 21 and 65 years with either a diagnosis of T2D and a BMI > 25 kg/m<sup>2</sup> or prediabetes and a BMI  
142 > 30 kg/m<sup>2</sup> were included in this study. Detailed study design including the inclusion and  
143 exclusion criteria were previously reported<sup>34,35</sup>. Briefly, the trial was an open-label, non-  
144 randomized, controlled, longitudinal study with patients divided into three groups. The T2D and  
145 pre-diabetes patients in the continuous care intervention (CCI) regimen self-selected either on-  
146 site (CCI-onsite) or web-based (CCI-web) education delivery. Educational content and medical  
147 treatment was the same for both CCI-onsite and CCI-web. As there were no significant  
148 differences in outcomes including PSQI scores, between educational groups, they are combined  
149 for further analysis<sup>34,35</sup>. Both T2D and prediabetes CCI patients had access to a mobile health  
150 application (app) that enabled them to communicate and be continuously monitored by a team  
151 of healthcare professionals including a personal health coach and physician or nurse  
152 practitioner. Patients received individualized guidance in achieving nutritional ketosis, typically  
153 including restriction of daily dietary carbohydrates to less than 30 grams. Patients were  
154 encouraged to measure and input weight, blood glucose and blood beta-hydroxybutyrate (BHB)  
155 concentrations daily in the app. These measurements were used by the health care team for  
156 monitoring the patient's condition (weight and glucose) and assessing carbohydrate restriction  
157 (BHB).

158 Separately recruited usual care (UC) T2D patients were participants in a local diabetes  
159 education program including care by their primary care physician or endocrinologist and  
160 counseling by registered dietitians; no modification to their care was made for the study. This  
161 group was observed at baseline and one year as reference for typical disease treatment and  
162 progression within the same geography and health system. (UC patients were informed that the  
163 trial had an intervention arm and could participate in that group if they chose to do so).

#### 164 ***Demographic and clinical variables***

165 Patient demographic and clinical data were collected at baseline, 70 days and one year.  
166 Laboratory measures were assessed at a Clinical Laboratory Improvement (CLIA) certified  
167 laboratory. These data were initially analyzed to evaluate the safety and effectiveness of the  
168 CCI in improving diabetes status (glycemic control and medication use), weight and other  
169 metabolic factors in T2D<sup>34,35</sup> and prediabetes patients<sup>36</sup>(unpublished data, manuscript in  
170 preparation). Some of the clinical variables - weight, fasting blood glucose, HbA1c, homeostatic  
171 model assessment of insulin resistance (HOMA-IR), BHB and high sensitivity C-reactive protein  
172 (hsCRP) - were included for further analyses in this study. Usual care T2D patients were not  
173 continuously monitored for weight, blood glucose, or BHB; clinical and laboratory measures  
174 were obtained for this group only at baseline and one year.

175

#### 176 ***Pittsburgh Sleep Quality Index (PSQI)***

177 CCI patients were administered a set of questionnaires, including the PSQI, during visits  
178 at baseline, 70 days and one year; UC participants completed questionnaires at baseline and  
179 one year. The PSQI consists of 19 validated questions assessing sleep quality and efficiency<sup>37</sup>.  
180 The global PSQI score is calculated from seven component scores on subjective sleep quality  
181 (component 1), sleep latency (component 2), sleep duration (component 3), habitual sleep  
182 efficiency (component 4), sleep disturbances (component 5), use of sleep medication  
183 (component 6) and daytime dysfunction (component 7). Each question within the component is

184 scored on a 4-point Likert scale of 0 to 3, with 3 indicating worse outcomes and the mean was  
185 calculated for each component score. The sum of the component score means generates the  
186 global PSQI score that ranges from 0 to 21. Higher global PSQI scores indicate poorer sleep. A  
187 patient with a global PSQI score  $\leq 5$  is considered a “good sleeper” and  $> 5$  is categorized as a  
188 “poor sleeper”<sup>38</sup>. Change in the PSQI score over time was calculated using the formula below:

$$189 \quad \text{Delta PSQI} = \frac{(\text{Post-intervention PSQI} - \text{Baseline PSQI})}{\text{Baseline PSQI}}$$

### 191 ***Pain, circadian rhythm disruption classification and CPAP usage***

192 Patients were classified into “pain” and “non-pain” groups based on their response to  
193 pain-related questions in both the PSQI (question 5i) and a separate questionnaire used to  
194 calculate the knee injury and osteoarthritis outcome score (KOOS). Overall KOOS results will be  
195 reported in a separate publication. Classification of patients under circadian rhythm “disrupted”  
196 and “non-disrupted” groups was based on the wake time and bedtime responses for PSQI  
197 questions 1 and 3 for compilation of component 4 (sleep efficiency). Patients were classified as  
198 having a shifted wake-up time if they reported typically waking between 11am and 2am, while  
199 those with bedtimes between 12am to 6pm were bedtime shifted. These arbitrary bedtime and  
200 wake time cut-off ranges were selected based on evening and night shift workers schedule (2nd  
201 shift - 3pm to 11pm and 3rd shift- 11pm to 7am); which causes these workers to have sleep  
202 patterns that deviate from a normal chronotype. Patients were also surveyed regarding CPAP  
203 usage and discontinuation, however detailed usage information such as CPAP pressure  
204 settings and usage compliance were not obtained making it difficult to interpret the patients OSA  
205 treatment status.

206

### 207 ***Statistical Analyses***

208 The questionnaires were administered by research personal and completed by patients  
209 on paper. Paper questionnaires were scanned and responses were transcribed in duplicate by



210 an independent contract data entry firm. The patterns of missing data were assessed using  
211 Little's MCAR test<sup>39</sup> and were found to be missing at random (MAR). Missing data were  
212 imputed by Multivariate Imputation by Chained Equations (MICE)<sup>40</sup>, and Intent to treat (ITT)  
213 analyses were performed. Normality of the global PSQI and component scores was evaluated  
214 using Lilliefors test. Even after transformation, the data failed the normality test (i.e. there was a  
215 skew toward lower PSQI scores and a long tail of higher scores) (Supplemental figures 1A-C);  
216 therefore, nonparametric tests were used for analyses of PSQI scores. Results from continuous  
217 variables were expressed as mean  $\pm$  standard deviation. Comparisons between groups were  
218 performed using the Kruskal-Wallis test, and comparisons within groups were performed using  
219 the Wilcoxon Sign Rank test. Tukey's honest significant difference test was used to analyze  
220 pairwise differences among significant results from omnibus tests. McNemar's test was used for  
221 assessing statistical significance of transitioning between 'good' and 'poor' sleeper among the  
222 CCI and UC cohorts.

223         Adjusted Pearson's and Spearman correlations were calculated between changes from  
224 baseline in global PSQI and changes in metabolic-parameters. Adjusted correlations were  
225 performed while controlling for age, gender and BMI at baseline. All participants in the CCI  
226 group were stratified by sleep improvement status based on their baseline and one year global  
227 PSQI scores. Patients that were initially considered "poor sleepers" with a baseline PSQI > 5  
228 but whose score after one year decreased to at or below the threshold of 5 were classified as  
229 *improved*. Those patients who were considered "good sleepers" at both baseline and one year  
230 were classified as *maintained*. Finally, those patients whose 1 year PSQI score was >5  
231 (regardless of their baseline score) were classified as *not improved*. Stepwise analyses of  
232 covariance (ANCOVA) were performed between the three different CCI sleep status groups at  
233 one year with the change of the glucose-related, ketone and inflammatory markers, while  
234 controlling by age, gender and years living with diabetes. Statistical tests were performed with

235 MATLAB R2017b using the Statistics and Machine Learning Toolbox<sup>41</sup> and the R statistical  
236 program version 3.5.0.<sup>42</sup>

237

238

## 239 **Results**

### 240 ***Baseline participant characteristics***

241 Details on the recruitment and extensive baseline characteristics of the CCI and UC T2D  
242 patients were previously published<sup>34,35</sup>. The demographic, glycemcic, inflammatory and sleep  
243 baseline characteristics of the participants that were included for assessments of sleep are  
244 presented in Table 1. One-hundred forty-three (54.6%) CCI T2D, 61(54%) CCI prediabetes, and  
245 53 (62.3%) UC T2D patients completed the PSQI at all expected time points. The global PSQI  
246 and component scores did not differ significantly among the groups (CCI T2D, CCI prediabetes  
247 and UC T2D) at baseline. The proportion of participants with overall poor sleep quality was  
248 higher in the CCI prediabetes group (77.9%) compared to the CCI T2D (68.3%) and UC T2D  
249 (68.2%) groups.

### 250 ***Effect of intervention on sleep***

#### 251 ***Global PSQI and component scores***

252 Overall sleep quality as assessed by the global PSQI score, improved in CCI T2D  
253 (median change from 7 to 6;  $p<0.001$ ) and prediabetes (median change from 7 to 5;  $p<0.001$ )  
254 groups after one year of the intervention (Figure 1). No significant change in the global PSQI  
255 score was observed in UC T2D (median change from 7 to 8,  $p=0.245$ ). At one year, global PSQI  
256 scores in the CCI T2D ( $p<0.001$ ) and prediabetes ( $p<0.01$ ) were significantly lower than in the  
257 UC T2D, whereas no differences were observed at baseline (Figure 2A). Among patients  
258 characterized as poor sleepers at baseline (global PSQI  $>5$ ), one year global PSQI score was  
259 lower in the CCI T2D ( $p<0.001$ ) and prediabetes ( $p<0.001$ ) than in the UC T2D (Figure 2B).  
260 Greater reduction in the global PSQI score was observed in CCI T2D (median change of -1,

261 p<0.01) and CCI prediabetes groups (median change of -2, p<0.001) compared to the UC T2D  
262 group (Figure 3). Further assessment of the PSQI component scores revealed three of the  
263 seven components showed significant change at one year for CCI T2D and prediabetes groups.  
264 Subjective sleep quality (p<0.01 CCI T2D; p<0.001 CCI prediabetes), sleep disturbance (p<0.01  
265 CCI T2D; p<0.001 CCI prediabetes) and daytime dysfunction (p<0.001 CCI T2D; p<0.001 CCI  
266 prediabetes) score were lower in the CCI T2D and prediabetes patients compared to the UC  
267 T2D group at one year (Figure 4 A-C).

### 268 ***Resolution of poor sleep quality***

269 There were 179 (68.3%) T2D and 88 (77.9%) prediabetes patients categorized as “poor  
270 sleepers” in the CCI at baseline. The proportions of “poor sleepers” in the CCI were reduced  
271 after one year of the intervention, with 56.5% of T2D (p=0.001) and 48.7% (p<0.001) of  
272 prediabetes patients categorized as “poor sleepers” at one year. In the UC cohort, the  
273 proportion of patients categorized as “poor sleepers” did not change after one year (68.2% at  
274 baseline to 69.4% at one year).

### 275 ***Association within the CCI group between changes in global PSQI with metabolic and*** 276 ***inflammatory markers***

277 Table 2 shows correlations between changes in the global PSQI score with changes in  
278 glucose-related, ketone and inflammatory markers in the CCI. In the prediabetes group,  
279 changes in fasting glucose (r= 0.23, p=0.02) and HOMA-IR (r= 0.32, p<0.001) were correlated  
280 to changes in PSQI scores after controlling for baseline age, sex and weight. Increased ketone  
281 concentrations in the prediabetes participants were also associated with reduction of global  
282 PSQI scores (r= -0.242, p=0.01). These correlations observed in the prediabetes group were  
283 not present in the CCI T2D group and changes in the HbA1c and hsCRP did not correlate with  
284 changes in global PSQI scores in either group. Change in mean weight (p=0.04) and HOMA-IR  
285 (p=0.01) were the only variables independently and significantly associated between the three  
286 different sleep status (improved, maintained and not improved sleep status) at one year of the

287 intervention. No statistically significant differences were found in weight loss changes between  
288 patients with improved, maintained and not improved sleep status. Patients who maintained  
289 sleep showed highest reductions of HOMA-IR ( $-6.94 \pm 0.86$ ), with statistically significant  
290 difference than those who did not improve sleep, after one year of the intervention ( $p = 0.02$ ).  
291 Improvements in HOMA-IR among patients in the improved sleep ( $-4.17 \pm 0.86$ ) and not  
292 improved sleep status ( $-4.24 \pm 0.55$ ) did not differ significantly.

### 293 ***Effect of persistent pain on sleep improvement***

294 We further assessed the effect of pain on sleep improvement in the CCI by classifying  
295 the patient's pain status using response retrieved from questions specifically related to pain in  
296 the sleep and knee (KOOS) questionnaires. As illustrated in supplementary figure 2, patients  
297 with pain had higher global PSQI scores, indicating poorer sleep, compared to those  
298 categorized under "non-pain" group at all three time points. Despite having a higher PSQI score,  
299 the patients in the "pain" group (Supplementary figure 3B,  $p < 0.01$ ) also showed no difference in  
300 reduction of the global PSQI score at 70 days and one year, relative to baseline as observed in  
301 the "non-pain" patients (Supplementary figure 3A,  $p < 0.001$ ).

### 302 ***Effect of circadian rhythm disruption on sleep improvement***

303 We also assessed the effect of circadian rhythm disruption on the global PSQI score  
304 improvement. Patients were classified as having circadian rhythm disruption based on their self-  
305 reported wake-up times and bedtimes as defined in the methods. There were 18, 27, and 96  
306 patients in the CCI cohort classified as both wake-up time and bedtime shifted, wake-up time  
307 shifted only or bedtime shifted only respectively. Patients with shifted bedtimes, had reduced  
308 global PSQI scores ( $p < 0.01$ ), as did those without any circadian rhythm disruption ( $p < 0.001$ )  
309 (Supplementary figures 4A and B). However, those patients with shifted wake-up times  
310 (Supplementary figures 4C) did not show a change in their global PSQI score after one year of  
311 the intervention. Those with both shifted wake-up times and bedtimes also did not show a  
312 change in their global PSQI score after one year of the intervention.

313 ***Effect of CPAP usage on sleep improvement***

314 At baseline, there were a total of 140 participants in both CCI and UC treatment groups  
315 with CPAP equipment prescribed for sleep. Among CPAP users, 91 were in the CCI T2D group,  
316 31 in the CCI prediabetes and 18 in the UC T2D group. Fifteen (13 CCI T2D and 2 UC T2D) of  
317 the 140 participants discontinued using CPAP at one year. Only 6 (46%) of the 13 CCI T2D  
318 participants discontinued due to patient-reported improvement in sleep quality from the CCI and  
319 reduction of weight; the remaining 7 reported dis-continuation due to discomfort or personal  
320 choice. Global PSQI scores among the CPAP users at baseline and one year did not show a  
321 significantly different distribution pattern than what was observed in the full cohort of  
322 participants.

323 **Discussion**

324 This study is one of the first designed to assess the effect of carbohydrate restriction and  
325 nutritional ketosis on sleep quality in individuals with hyperglycemia and insulin resistance.  
326 Improved patient-reported sleep quality as assessed by global PSQI suggests that CCI  
327 including nutritional ketosis benefited sleep quality in both patients with T2D and prediabetes.  
328 The proportion of patients categorized as “poor sleepers” at one year was significantly reduced  
329 in the CCI groups but not in the UC group. Furthermore, these results demonstrate that the  
330 sleep quality improvement observed in the whole intervention population was due in part to 17%  
331 of baseline “poor sleepers” being reclassified as “good sleepers” at one year. Our results are  
332 consistent with previous findings that showed improved overall sleep quality in children  
333 consuming ketogenic diets <sup>31, 32</sup>.

334 Improvement in the global PSQI score of patients undergoing the CCI was mainly  
335 due to significant changes in three PSQI components: subjective sleep quality, sleep  
336 disturbance and daytime dysfunction. Both objective and subjective sleep quality impairment are  
337 frequently reported in diabetes patients and positively associated with severity of hyperglycemia  
338 <sup>8-11</sup>. Likewise, correlation between poor sleep quality and increased carbohydrate intake <sup>30</sup> is

339 also previously reported. These observed patterns of association between sleep quality with  
340 hyperglycemia and carbohydrate intake may explain why this carbohydrate restriction  
341 intervention improved subjective sleep quality. The sleep disturbance component of the global  
342 PSQI score is associated with poor glycemic control among T2D patients<sup>43</sup>. One study reported  
343 a significant correlation between sleep disturbance and HbA1c level<sup>44</sup>. Night time sleep  
344 disturbance in T2D patients can be related to a wide range of conditions such as nocturnal  
345 polyuria, pain, and breathing problems, especially in those with OSA. In our study, we also  
346 showed that patients encountering persistent pain, including knee pain, had a higher median  
347 global PSQI score, while one year of the intervention effectively improved global PSQI scores in  
348 these patients despite the persistence of reported pain in some patients. It is possible that  
349 improvement in the sleep disturbance of the CCI patients contributed to the glycemic control  
350 improvement in these patients. The effectiveness of the intervention in improving sleep in those  
351 with pain, further emphasizes its' applicability in alleviating sleep disturbance.

352 Furthermore, there was a significant improvement in the daytime dysfunction component  
353 of the global PSQI score in the CCI group. Excessive daytime sleepiness and dysfunction are  
354 reported commonly in T2D<sup>45,46</sup>, and weight loss through bariatric surgery has a positive  
355 resolving effect on daytime dysfunction and sleepiness<sup>47,48</sup>. In the present investigation, the  
356 majority of CCI patients achieved weight loss of  $\geq 10\%$ , which could have contributed to the  
357 significant improvement observed in daytime function. In addition, we also evaluated the effect  
358 of the intervention on a subcohort of patients with a self-reported pattern of shifted non-standard  
359 bedtimes and wake-up times that were not aligned to the light dark cycle, which likely affects  
360 daytime functioning. Circadian rhythm disruption is frequently associated with metabolic  
361 alterations, especially in an insulin resistant state<sup>49,50</sup>. While patients with a normal sleep  
362 chronotype benefited the most, the intervention also improved the sleep of patients with time  
363 shifted bedtimes. A similar advantage of the intervention was not observed in patients with

364 shifted wake-up times, though this may be due to the limited number of patients in this subgroup  
365 (n=27).

366 The improvement in the global PSQI score observed in CCI patients occurred  
367 concurrently with weight reduction and glycemic control improvement<sup>34,35</sup>. Martin et al<sup>51</sup>  
368 reported a direct correlation between degree of weight loss and global PSQI score improvement  
369 in healthy nonobese adults receiving an energy restricted diet, while Chaput et al<sup>52</sup> reported an  
370 improvement in global PSQI score following the initial 5-kg weight loss, but no additional  
371 improvement with subsequent weight loss. A study using a ketogenic diet in children alleviated  
372 abnormal sleep architecture; however, weight loss was suggested as the main determinant of  
373 improved sleep<sup>33</sup>. These studies collectively imply a direct association between weight loss and  
374 improved PSQI score, but some studies also demonstrate the efficacy of anti-glycemic  
375 medications for improving PSQI score concurrent with improved glycemic control<sup>53</sup>. This study  
376 identified associations between HOMA-IR and weight reductions with stratification of patients'  
377 sleep status in the full CCI cohort even though there were no significant differences in weight  
378 loss and insulin resistance reduction levels between those who had improved sleep and those  
379 who did not. Patients with good sleep quality at the beginning of the intervention benefited the  
380 most in reducing insulin resistance. Improvement in fasting glucose and HOMA-IR were only  
381 positively associated with improved PSQI score in prediabetes patients.

382 It is not clear if nutritional ketosis achieved by substantial carbohydrate restriction  
383 augmented the effect of the intervention on sleep or if weight loss and/or improved glycemic  
384 control generated from the intervention contributed to sleep quality improvements. We showed  
385 a significant correlation between blood beta-hydroxybutyrate (BHB) levels and PSQI  
386 improvement in the prediabetes cohort. While the effect of and mechanism of BHB in sleep are  
387 not clear, a positive correlation between blood BHB levels and carbon dioxide (CO<sub>2</sub>) response  
388 was previously reported in patients with obesity related hypoventilation syndrome that had  
389 reduced CO<sub>2</sub> response<sup>54</sup>. A continuous state of ketosis through carbohydrate restriction and fat

390 intake also induces the postprandial release of a satiety hormone, cholecystokinin (CCK)<sup>28,55,56</sup>.  
391 When administered in rats, CCK was shown to promote slow wave activity and NREM sleep<sup>57</sup>.  
392 CCK was also shown to induce sleep when administered in diabetic rats<sup>58</sup>. Therefore, it is  
393 possible that one mechanism of improved sleep with a ketogenic diet that increases BHB levels  
394 is through CCK induction.

395         There are several limitations of our study. The study was designed mainly to assess the  
396 impact of the CCI on glycemic control, medication use, weight, and cardiovascular disease risk  
397 factors. Patient-reported outcomes for quality of life measures including sleep were included as  
398 secondary endpoints. It is difficult to determine the causality among the intervention,  
399 improvement in primary outcomes and improvement in sleep from this study. A major limitation  
400 of this study is the use of subjective sleep measures as self-reported sleep assessment is  
401 subject to limited self-knowledge of sleep behavior and inconsistency in reporting. Therefore,  
402 future studies that use randomized controlled trial designs and objective sleep measures are  
403 needed to confirm our results. In addition, patients with an established diagnosis of a sleep  
404 disorder such as OSA were not separated in the analysis since complete records of their CPAP  
405 usage were not collected in the questionnaire. Patient compliance with CPAP usage is essential  
406 for making interpretations about the status of their OSA treatment and its effect on sleep and  
407 glycemic control.

408         In conclusion, these results demonstrate that overall sleep quality significantly improved  
409 in T2D and prediabetes patients undergoing remote CCI including nutritional ketosis but not in  
410 T2D patients in the UC group. The sleep improvement was concurrent with weight reduction  
411 and glycemic control improvement. The PSQI components that improved were sleep quality,  
412 sleep disturbance and daytime dysfunction. These results suggest that nutritional ketosis  
413 benefits overall health through improved glycemic control as well as improved sleep quality.

414

415



1 **Figure Legends**

2  
3 **Figure 1.** Distribution of global PSQI scores at baseline and 365 days in CCI T2D, CCI PreD and UC T2D. Global PSQI score was  
4 significantly reduced in the CCI T2D and CCI PreD groups but not in the UC T2D group after 365 days.

5  
6 **Figure 2.** Distribution of global PSQI scores in CCI T2D, CCI PreD and UC T2D at three different timepoints (0, 70 and 365 days) (A)  
7 Among the full patient cohort, global PSQI were significantly lower in the CCI T2D and CCI PreD when compared to UC T2D at 365  
8 days. (B) Among the “poor sleepers” at baseline, global PSQI were significantly lower in the CCI T2D and CCI PreD when compared  
9 to UC T2D after 365 days. (UC T2D patients were not surveyed at 70 days.)

10  
11 **Figure 3.** Distribution of change in global PSQI score in CCI T2D, CCI PreD and UC T2D after 365 days. The scores showed  
12 significant reduction in the CCI T2D and CCI PreD groups relative to baseline and to the UC T2D group.

13  
14 **Figure 4.** Distribution of PSQI components subjective sleep quality, sleep disturbances and daytime dysfunction in CCI T2D, CCI  
15 PreD and UC T2D groups at three different timepoints (0, 70 and 365 days). Subjective sleep quality (A), sleep disturbances (B), and  
16 daytime dysfunction (C) were significantly lower in the CCI T2D and CCI PreD groups when compared to UC T2D group at 365 days.

17  
18 *Boxplot descriptors (Figures 1-4) Horizontal line within the box indicates median; upper and lower boundaries of the box represent*  
19 *the 25th and 75th quartiles; whiskers of the box is the highest and lowest values and “+++” signs represent outlier values.*

20  
21 *\*\* p-value <0.01; \*\*\* p-value <0.001*

33 **Figure 1.**

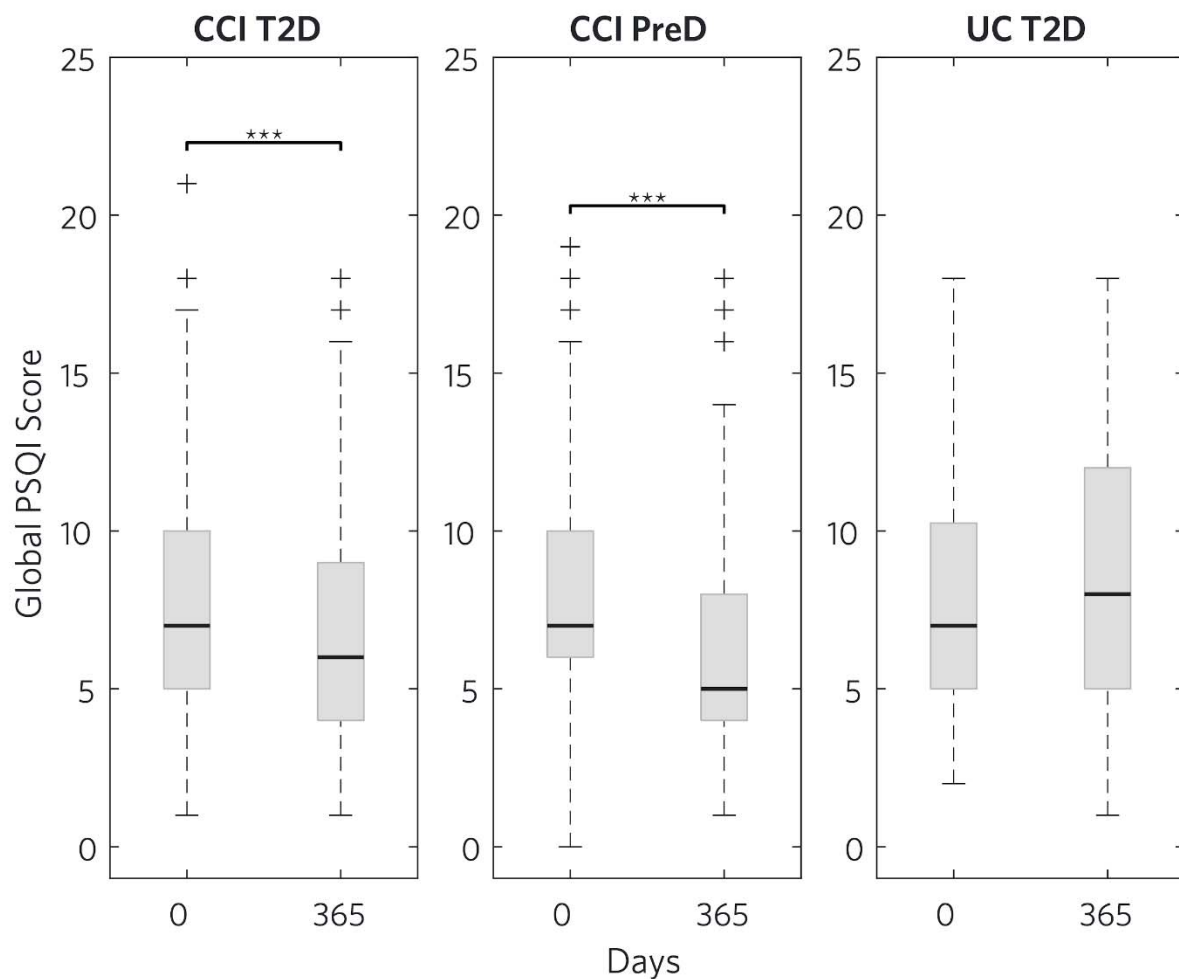

34  
35  
36  
37  
38  
39

40 **Figure 2.**  
41

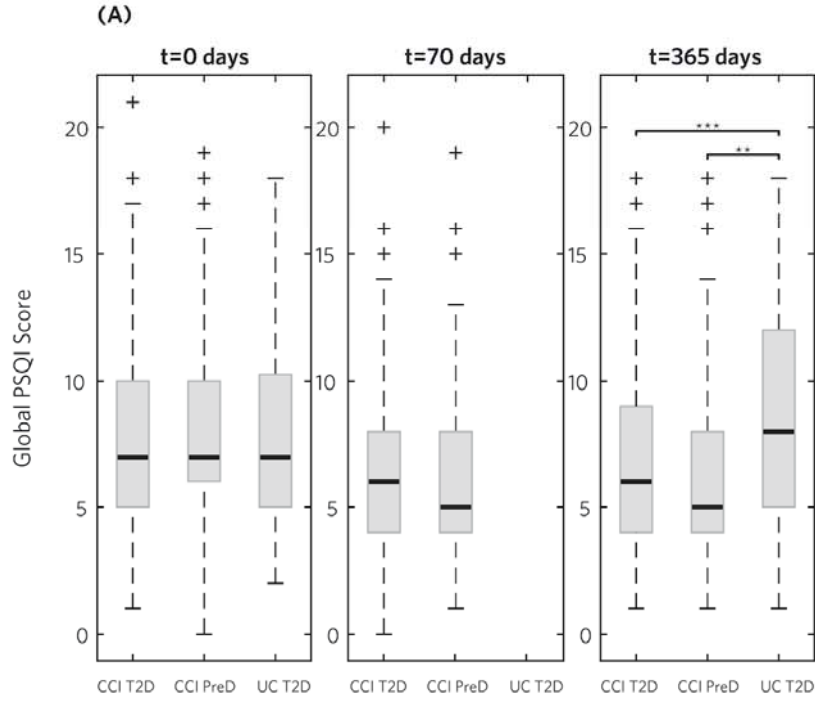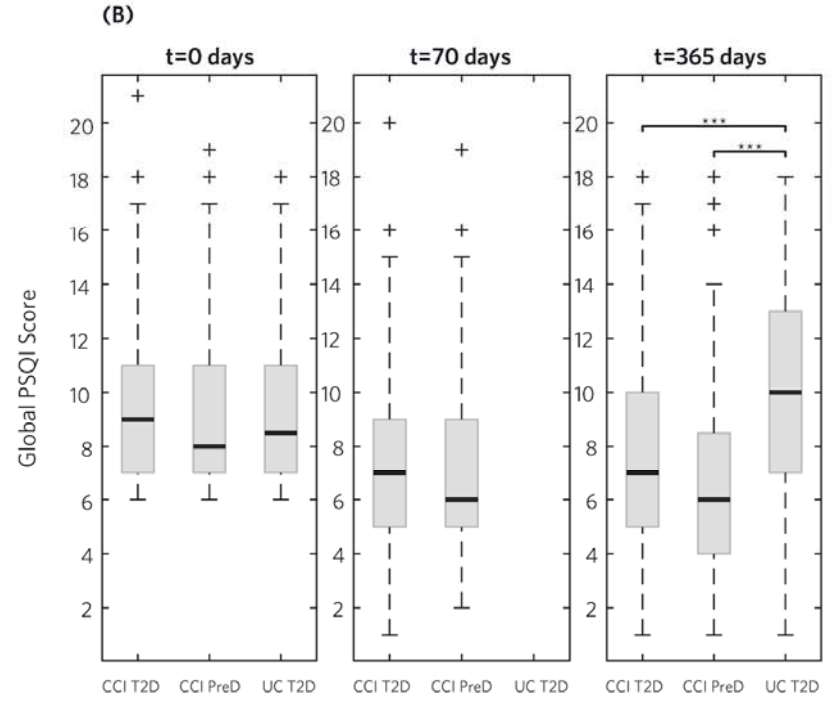

42  
43  
44  
45  
46  
47  
48  
49  
50  
51  
52  
53

54 **Figure 3.**  
55

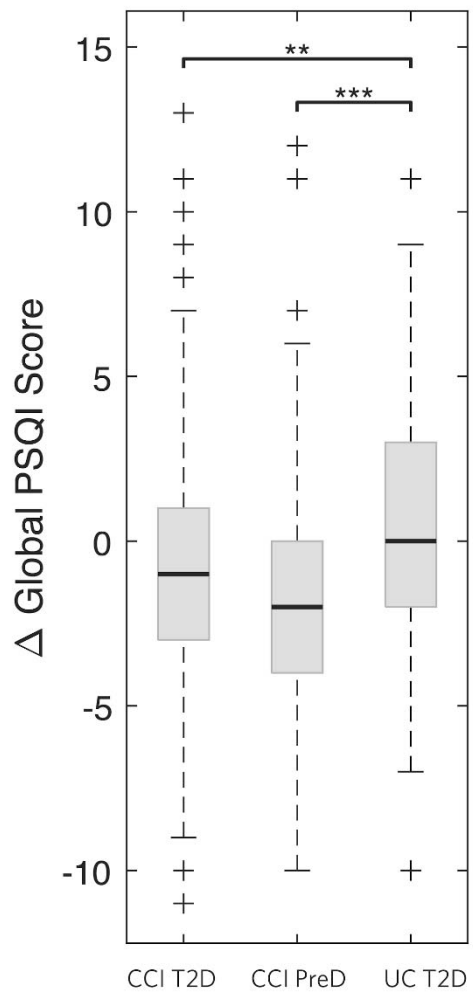

56  
57  
58

59  
60  
61  
62

Figure 4.

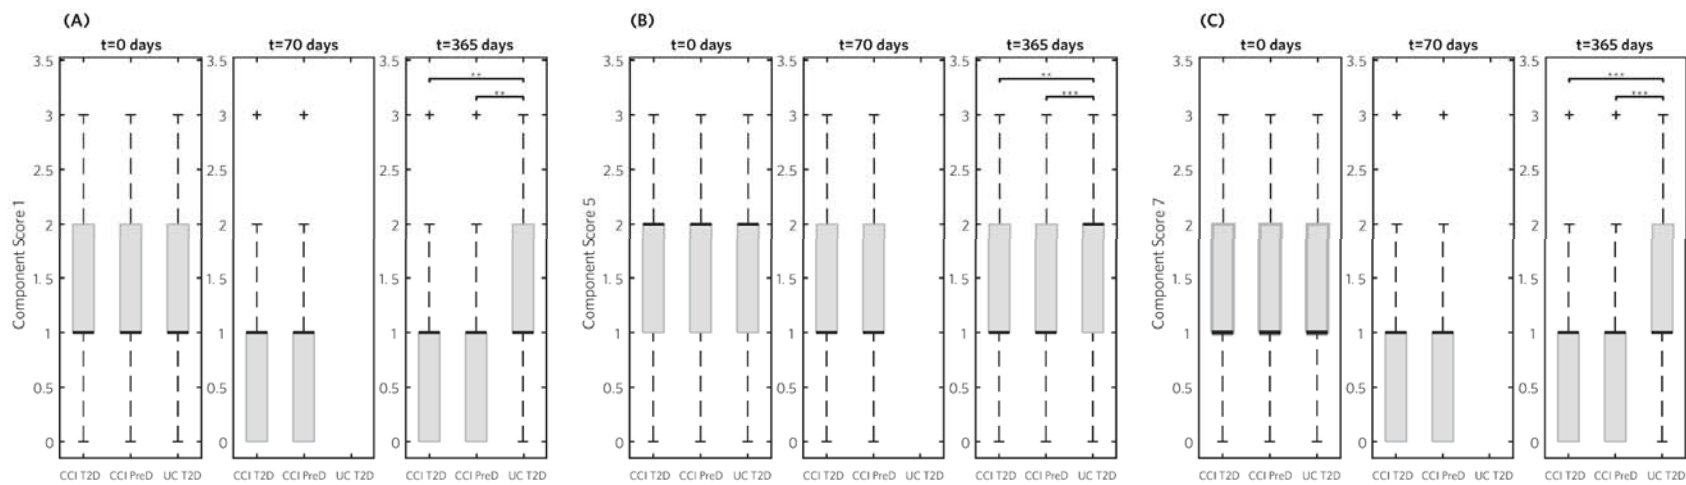

63  
64

65 **Table 1.** Baseline characteristics of participants included in the study. Baseline data were calculated using intent-to-treat  
 66 (ITT) data

| <b>Patient Cohorts</b>                              | <b>CCI Type 2 Diabetes</b> | <b>CCI Prediabetes</b> | <b>UC Type 2 Diabetes</b> |
|-----------------------------------------------------|----------------------------|------------------------|---------------------------|
| <b>Starters, Completers, PSQI Available (n)</b>     | 262, 218, 143              | 116, 113, 61           | 87, 78, 53                |
|                                                     | <b>mean (S.D.)</b>         |                        |                           |
| <b>Age (years)</b>                                  | 53.8 (± 8.4)               | 51.9 (± 9.4)           | 52.7 (± 9.3)              |
| <b>Male/female (ratio)</b>                          | 87/175 (1:2)               | 29/84 (1:3)            | 35/50 (2:3)               |
| <b>Body weight (kg)</b>                             | 116.4 (± 26.1)             | 109.9(± 23.6)          | 108.3 (± 25.1)            |
| <b>BMI (kg/m<sup>2</sup>)</b>                       | 40.4 (± 8.9)               | 38.8 (± 7.1)           | 38.2 (± 9.1)              |
| <b>Fasting glucose (mg/dL)</b>                      | 160.78 (± 61.32)           | 109.58 (± 15.20) *     | 157.08 (± 72.48)          |
| <b>HbA1c (%)</b>                                    | 7.60 (± 1.50)              | 5.91 (± 0.24) *        | 7.67 (± 1.77)             |
| <b>HOMA-IR</b>                                      | 11.8 (± 13.1)              | 7.1 (± 7.4) *          | 13.7 (± 17.8)             |
| <b>high sensitivity C-reactive protein (nmol/L)</b> | 9.31 (± 19.31)             | 7.46 (± 7.51)          | 9.34 (± 9.10)             |
| <b>Beta-hydroxybutyrate (mmol/L)</b>                | 0.17 (± 0.15)              | 0.14 (± 0.13)          | 0.15 (± 0.12)             |
| <b>Global PSQI Score</b>                            | 7.72 (± 3.72)              | 7.96(± 3.43)           | 7.92 (± 3.85)             |

|                                  |               |                |               |
|----------------------------------|---------------|----------------|---------------|
| <b>Subjective sleep quality</b>  | 1.18 (± 0.75) | 1.22 (± 0.73)  | 1.25 (± 0.79) |
| <b>Sleep latency</b>             | 1.09 (± 0.93) | 1.33 (± 0.958) | 1.05 (± 0.89) |
| <b>Sleep duration</b>            | 1.23 (± 0.92) | 1.27 (± 0.96)  | 1.14 (± 0.94) |
| <b>Habitual sleep efficiency</b> | 0.68 (± 0.99) | 0.61 (± 0.89)  | 0.71 (± 1.04) |
| <b>Sleep disturbances</b>        | 1.64 (± 0.63) | 1.66 (± 0.68)  | 1.75 (± 0.74) |
| <b>Use of sleep medication</b>   | 0.69 (± 1.16) | 0.66 (± 1.11)  | 0.85 (± 1.26) |
| <b>Daytime dysfunction</b>       | 1.22 (± 0.77) | 1.21 (± 0.76)  | 1.17 (± 0.86) |
| <b>Poor sleepers N (%)</b>       | 179 (68.3)    | 88 (77.9)      | 58 (68.2)     |
| <b>Good sleepers N (%)</b>       | 83 (31.7)     | 25 (22.1)      | 27 (31.8)     |

67 **Note.** Subjective sleep quality, component 1; sleep latency, component 2; sleep duration, component 3; habitual sleep efficiency,  
 68 component 4; sleep disturbances, component 5; use of sleep medication, component 6, and daytime dysfunction, component 7

69 \*p-value <0.001

70

71

72

73

74

75

76

77

78 **Table 2.** Correlation analyses between change in the global PSQI score and change in metabolic parameters after one

79 year of CCI

80

| Variable                             | CCI T2D Cohort<br>N=262 |                                |                      |                                | CCI Prediabetes Cohort<br>N=113 |                    |                      |                                |
|--------------------------------------|-------------------------|--------------------------------|----------------------|--------------------------------|---------------------------------|--------------------|----------------------|--------------------------------|
|                                      | <i>rho</i>              | <i>P</i><br>value <sup>†</sup> | Adjusted<br><i>r</i> | <i>P</i><br>value <sup>+</sup> | <i>rho</i>                      | <i>P</i><br>value* | Adjusted<br><i>r</i> | <i>P</i><br>value <sup>+</sup> |
| <b>Δ Fasting glucose<br/>(mg/dl)</b> | 0.032                   | 0.60                           | 0.008                | 0.90                           | 0.240                           | 0.01               | 0.226                | 0.018                          |
| <b>Δ HbA1c (%)</b>                   | -0.037                  | 0.55                           | -0.049               | 0.44                           | -0.024                          | 0.80               | -0.032               | 0.74                           |
| <b>Δ HOMA-IR</b>                     | -0.060                  | 0.34                           | -0.069               | 0.27                           | 0.314                           | 0.0008             | 0.323                | 0.0006                         |
| <b>Δ BHB</b>                         | -0.003                  | 0.96                           | -0.044               | 0.49                           | -0.297                          | 0.002              | -0.242               | 0.011                          |
| <b>Δ hsCRP</b>                       | -0.067                  | 0.29                           | -0.008               | 0.90                           | -0.022                          | 0.82               | -0.032               | 0.74                           |

81

82 \* Spearman and <sup>†</sup>adjusted Pearson's correlations. Adjustments while controlling for age, sex and baseline weight

83

84

85

86

87

88



## 1   **References**

- 2       1. Kuhn E, Brodan V, Brodanova M, Rynasek K. Metabolic reflection of sleep deprivation.  
3           Act Nerv Super 1969; 11: 165-174.
- 4       2. Spiegel K, Leproult R, Van Cauter E. Impact of sleep debt on metabolic and endocrine  
5           function. Lancet 1999; 354: 1435-1439.
- 6       3. Spiegel K, Knutson K, Leproult R, et al. Sleep loss: a novel risk factor for insulin  
7           resistance and type-2 diabetes. J Appl Physiol 2005; 99: 2008-2019.
- 8       4. Nedeltcheva AV, Kessler L, Imperial J, Penev PD. Exposure to recurrent sleep  
9           restriction in the setting of high caloric intake and physical inactivity results in increased  
10          insulin resistance and reduced glucose tolerance. J Clin Endocrinol Metab 2009; 94:  
11          3242-3250.
- 12      5. Ayas NT, White DP, Al-Delaimy WK, et al. A prospective study of self-reported sleep  
13          duration and incident diabetes in women. Diabetes Care 2003; 163: 205-209.
- 14      6. Nilsson PM, Roost M, Engstrom G, et al. Incidence of diabetes in middle-aged men is  
15          related to sleep disturbances. Diabetes Care 2004; 27: 2464-2469.
- 16      7. Kawakami N, Takatsuka N, Shimizu H. Sleep disturbance and onset of type 2 diabetes.  
17          Diabetes Care 2004; 27: 282-283.
- 18      8. Lee SW, Ng KY, Chin WK. The impact of sleep amount and sleep quality on glycemic  
19          control in type 2 diabetes: A systematic review and meta-analysis. Sleep Med Reviews  
20          2017; 31: 91-101.
- 21      9. Knutson KL, Ryden AM, Mander BA, Van Cauter E. Role of sleep duration and quality in  
22          the risk and severity of type 2 diabetes mellitus. Arch Intern Med 2006; 166: 1768-1774.
- 23      10. Sakamota R, Yamakawa T, Takahashi K, et al. Association of usual sleep quality and  
24          glycemic control in type 2 diabetes in Japanese: A cross sectional study. Sleep and  
25          Food Registry in Kanagawa (SOREKA). PLoS One 2017;  
26          <https://doi.org/10.1371/journal.pone.0191771>.

- 27 11. Tsai YW, Kann NH, Tung TH, et al. Impact of subjective sleep quality on glycemic  
28 control in type 2 diabetes mellitus. *Family Prac* 2012; 29: 30-35.
- 29 12. Trento M, Broglio F, Riganti F, et al. Sleep abnormalities in type 2 diabetes may be  
30 associated with glycemic control. *Acta Diabetol* 2008; 45: 225-229.
- 31 13. Gozashti MH, Eslami N, Radfar MH, Pakmanesh H. Sleep pattern, duration and quality  
32 in relation with glycemic control in people with type 2 diabetes mellitus. *Iran J Med Sci*  
33 2016; 41: 531-538.
- 34 14. Resnick HE, Redline S, Shafar E, et al. Diabetes and sleep disturbances findings from  
35 the Sleep Heart Health Study. *Diabetes Care* 2003; 26 (3): 702-709.
- 36 15. Foster GD, Sander MH, Millman R, et al. Obstructive sleep apnea among obese patients  
37 with type 2 diabetes. *Diabetes Care* 2009; 32: 1017-1019.
- 38 16. American Diabetes Association. 3. Comprehensive medical evaluation and assessment  
39 of comorbidities: Standards of medical care in diabetes. *Diabetes Care* 2018; 41: S28-  
40 S37.
- 41 17. The IDF Consensus statement on sleep apnoea and type 2 diabetes 2008. 1-24.
- 42 18. Foster GD, Borradaile KD, Sanders MH, et al. A randomized study on the effect of  
43 weight loss on obstructive sleep apnea among obese patients with type 2 diabetes: the  
44 Sleep AHEAD study. *Arch Intern Med* 2009; 169: 1619-1626.
- 45 19. Greenburg DL, Lettieri CJ, Eliasson AH. Effects of surgical weight loss on measures of  
46 obstructive sleep apnea: a meta-analysis. *Am J Med* 2009; 122: 535-542.
- 47 20. Shaw JE, Punjabi NM, Naughton MT, et al. The effect of treatment of obstructive sleep  
48 apnea on glycemic control in type 2 diabetes. *Am J Respir Crit Care Med* 2016; 194:  
49 486-492.
- 50 21. West SD, Nicoll DJ, Wallace TM, et al. Effect of CPAP on insulin resistance and HbA1c  
51 in men with obstructive sleep apnoea and type 2 diabetes. *Thorax* 2017; 62: 486-492.

- 52 22. Martinez-Ceron E, Barquiel B, Bezos AM, et al. Effect of continuous positive airway  
53 pressure on glycemic control in patients with obstructive sleep apnea and type 2  
54 diabetes. A randomized clinical trial. *Am J Respir Crit Care Med* 2016; 194: 476-485.
- 55 23. Pamidi S, Wroblewski K, Stephen M, et al. Eight hours of nightly continuous positive  
56 airway pressure treatment of obstructive sleep apnea improves glucose metabolism in  
57 patients with prediabetes. A randomized controlled trial. *Am J Respir Crit Care Model*  
58 2015; 192: 96-105.
- 59 24. Weinstock TG, Wang X, Rueschman M, et al. A controlled trial of CPAP therapy on  
60 metabolic control in individuals with impaired glucose tolerance and sleep apnea. *Sleep*  
61 2012; 35: 617-625B.
- 62 25. Phillips F, Chen CN, Crisp AH, et al. Isocaloric diet changes and  
63 electroencephalographic sleep. *Lancet* 1975; 2: 723-725.
- 64 26. Yajima K, Seya T, Iwayama H, et al. Effects of nutrient composition of dinner on sleep  
65 architecture and energy metabolism during sleep. *J Nutr Sci Vitaminol* 2014; 60:114-  
66 121.
- 67 27. Lindseth G, Lindseth P, Thompson M. Nutritional effects on sleep. *West J Nurs Res*  
68 2013; 35: 497-513.
- 69 28. Afaghi A, O'Connor H, Chow CM. Acute effects of the very low carbohydrate diet on  
70 sleep indices. *Nutr Neurosci* 2008; 11: 146-154.
- 71 29. Kwan RM, Thomas S, Mir MA. Effects of a low carbohydrate isoenergetic diet on sleep  
72 behavior and pulmonary functions in healthy female adult humans. *J Nutr* 1986; 116:  
73 2393-2402.
- 74 30. Katagiri R, Asakura K, Kobayashi S, et al. Low intake of vegetables, high intake of  
75 confectionary, and unhealthy eating habits are associated with poor sleep quality among  
76 middle-aged female Japanese workers. *J Occup Health* 2014; 56: 359-368.

- 77 31. Husain AM, Yancy Jr WS, Carwile ST, et al. Diet therapy for narcolepsy. *Neurology*  
78 2004; 62: 2300-2302.
- 79 32. Hallbrook T, Lundgren J, Rosen I. Ketogenic diet improves sleep quality in children with  
80 therapy-resistant epilepsy. *Epilepsia* 2007; 48: 59-65.
- 81 33. Willi SM, Oexmann MJ, Wright NM, et al. The effects of high-protein, low-fat, ketogenic  
82 diet on adolescents with morbid obesity, body composition, blood chemistries and sleep  
83 abnormalities. *Pediatrics* 1998; 101: 61-67.
- 84 34. Hallberg SJ, McKenzie AL, Williams PT, et al. Effectiveness and safety of a novel care  
85 model for the management of type 2 diabetes at 1 year: an open-label, non-randomized,  
86 controlled study. *Diabetes Ther* 2018; 9: 583-612
- 87 35. Bhanpuri NH, Hallberg SJ, Williams PT, et al. Cardiovascular disease risk factor  
88 responses to a type 2 diabetes care model including nutritional ketosis induced by  
89 sustained carbohydrate restriction at 1 year: an open label, non-randomized, controlled  
90 study. *Cardiovasc Diabetol* 2018; 17: <https://doi.org/10.1186/s12933-018-0698-8>.
- 91 36. McKenzie AL, Hallberg SJ, Bhanpuri NH, et al. Continuous remote care model utilizing  
92 nutritional ketosis improves type 2 diabetes risk factors in patients with prediabetes.  
93 American Diabetes Association 78th Scientific Sessions, June 2018. *Diabetes*  
94 67(Supplement 1) <https://doi.org/10.2337/db18-293-OR>
- 95 37. Buysse DJ, Reynolds CF, Monk TH, et al. The Pittsburgh Sleep Quality Index (PSQI): A  
96 new instrument for psychiatric research and practice. *Psychiatrist Res* 1989; 28: 193-  
97 213.
- 98 38. Smith MT, Wegener ST. Measures of sleep: The Insomnia severity index, Medical  
99 outcomes study (MOS) sleep scale, Pittsburgh Sleep Diary (PSD), and Pittsburgh Sleep  
100 Quality Index (PSQI). *Arthritis & Rheumatism* 2003; 49: S184-S189.

- 101 39. Alexander BA BaylorEdPsych: R Package for Baylor University Educational Psychology  
102 Quantitative Courses. R package version 0.5. 2012: [https://CRAN.R-](https://CRAN.R-project.org/package=BaylorEdPsych)  
103 [project.org/package=BaylorEdPsych](https://CRAN.R-project.org/package=BaylorEdPsych)
- 104 40. van Buuren S, Groothuis-Oudshoorn K. mice: Multivariate Imputation by Chained  
105 Equations in R. *Journal of Statistical Software* 2011; 45: 1-67.
- 106 41. MATLAB and Statistics Toolbox Release 2017b, The MathWorks, Inc., Natick,  
107 Massachusetts, United States.
- 108 42. R Core Team. R: A language and environment for statistical computing.  
109 R Foundation for Statistical Computing 2018, Vienna, Austria. URL  
110 <https://www.R-project.org/>.
- 111 43. Song Y, Ye X, Ye L, et al. Disturbed subjective sleep in chinese females with type 2  
112 diabetes on insulin therapy. *PLoS ONE* 2013; 8(1):  
113 e54951.doi.10.1377/journal.pone.005495`.
- 114 44. Suarez EC. Self-reported symptoms of sleep disturbance and inflammation, coagulation,  
115 insulin resistance and psychosocial distress: evidence for gender disparity. *Brain Behav*  
116 *Immun* 2008; 22: 960-988.
- 117 45. Chasens ER, Korytkowski M, Sereika SM, et al. Effect of poor sleep quality and  
118 excessive daytime sleepiness on factors associated with diabetes self management.  
119 *Diabetes Educ* 2013; 39: 74-82.
- 120 46. Telford O, Diamantidis CJ, Bosworth HB, et al. The relationship between Pittsburgh  
121 Sleep Quality Index subscales and diabetes control. *Chronic Illn* 2018; doi:  
122 10.1177/1742395318759587.
- 123 47. Mello M, Vasques ACJ, Pareja JC, et al. Effect of biliopancreatic diversion on sleep  
124 quality and daytime sleepiness in patients with obesity and type 2 diabetes. *Arch*  
125 *Endocrinol Metab* 2017; 61: 623-627.

- 126 48. Dilektasli E, Dilektasli AG. Laparoscopic sleeve gastrectomy improves excessive  
127 daytime sleepiness and sleep quality 6 months following surgery: a prospective cohort  
128 study. *Adv Ther* 2016; 33: 774-785.
- 129 49. Pan A, Schernhammer ES, Sun Q, et al. Rotating night shift work and risk of type 2  
130 diabetes: two prospective cohort studies in women. *PLoS Med*. 2011;8:e1001141.
- 131 50. Reutrakul S, Hood MM, Crowley SJ, et al. Chronotype is independently associated with  
132 glycemic control in type 2 diabetes. *Diabetes Care*. 2013;36:2523–9.
- 133 51. Martin CK, Bhapkar M, Pittas AG, et al. Effect of calorie restriction on mood, quality of  
134 life, sleep and sexual function in healthy nonobese adults: The CALERIE 2 Randomized  
135 Clinical Trial. *JAMA Intern Med* 2016; 176: 743-752.
- 136 52. Chaput JP, Drapeau V, Hetherington M, et al. Psychobiological impact of a progression  
137 weight loss program in obese men. *Physiol Behav* 2005; 86: 224-232.
- 138 53. Sakamoto Y, Oyama J, Ikeda H, et al. Effects of sitagliptin beyond glycemic control:  
139 focus on quality of life. *Cardiovasc Diabetol* 2013; 12: 35. doi 10.1186/1475-2840-12-35.
- 140 54. Fried PI, McClean PA, Phillipson EA, et al. Effect of ketosis on respiratory sensitivity to  
141 carbon dioxide in obesity. *N Engl J Med* 1976; 294: 1081-1086.
- 142 55. Hayes MR, Miller CK, Ulbrecht JS, et al. A carbohydrate-restricted diet alters gut  
143 peptides and adiposity signals in men and women with metabolic syndrome. *J Nutr*  
144 2007; 137: 1944-1950.
- 145 56. Chearskul S, Delbridge E, Shulkes A, et al. Effect of weight loss and ketosis on  
146 postprandial cholecystokinin and free fatty acid concentrations. *Am J Clin Nutr* 2008; 87:  
147 1238-1246.
- 148 57. Kapás L, Obal F Jr., Alfoldi P, et al. Effects of nocturnal intraperitoneal administration of  
149 cholecystokinin in rats: simultaneous increase in sleep, increase in EEG slow-wave  
150 activity, reduction of motor activity, suppression of eating, and decrease in brain  
151 temperature. *Brain Res* 1988;438:155–64.

152           58. Kapás L, Obal F, Farkas I, et al. Cholecystokinin promotes sleep and reduces food  
153           intake in diabetic rats. *Physiol Behav* 1991; 50: 417–20.

154
